# Supplementary material for: 2D quasi-ordered nitrogen and sulfur co-doped carbon materials from ionic liquid as metal-free electrocatalysts for ORR
Source: Royal Society of Chemistry journal article supplement (doi:10.1039/c6ra28381k), 2017-01-01
Supplement: c6ra28381k1.pdf [file c6ra28381k1.pdf]

## Supporting information

### 2D quasi-ordered nitrogen and sulfur co-doped carbon materials from ionic liquid as metal-free electrocatalysts for ORR

Bao-Bing Huang<sup>1</sup>, Zhi-Yong Luo<sup>1</sup>, Jun-Jun Zhang<sup>2</sup>, and Zai-Lai Xie<sup>1\*</sup>

| Table S1. Characteristics of nitrogen doped carbons from ILs. |                         |                           |                            |                           |
|---------------------------------------------------------------|-------------------------|---------------------------|----------------------------|---------------------------|
| ILs                                                           | T of decomposition [°C] | Carbonization yield[%][a] | Carbonization yield [%][b] | Adenine percentage [%][c] |
| A                                                             | 290                     | 0                         | -                          | 100                       |
| A+HNTf <sub>2</sub>                                           | 306.9                   | 24.5                      | 21.5                       | 24.6                      |

[a]TG yield at 500 °C. [b]Oven yield. [c]Theoretical value of adenine wt% for respective precursors.

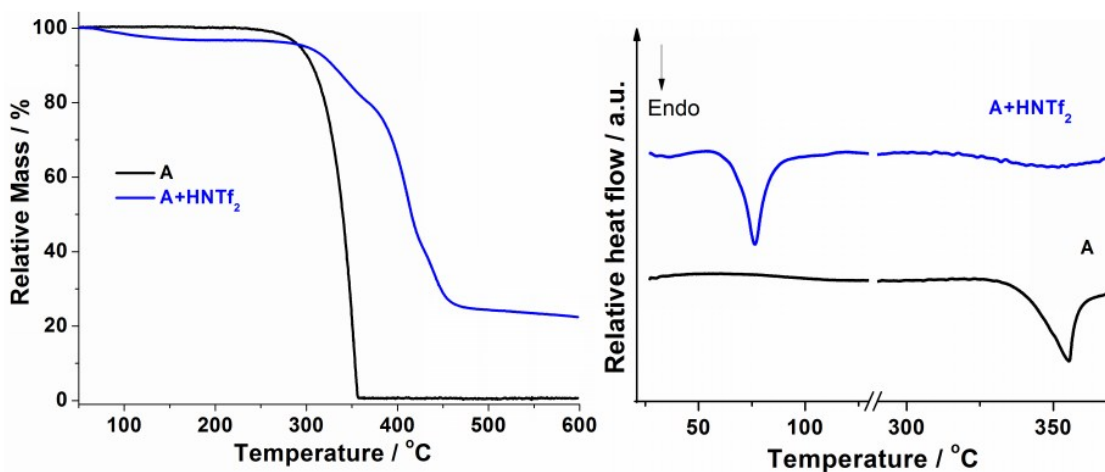

**Figure S1.** TGA and DSC profiles of adenine and adenine-based ionic liquids under flowing argon with a ramp rate of 5 °C min<sup>-1</sup>.

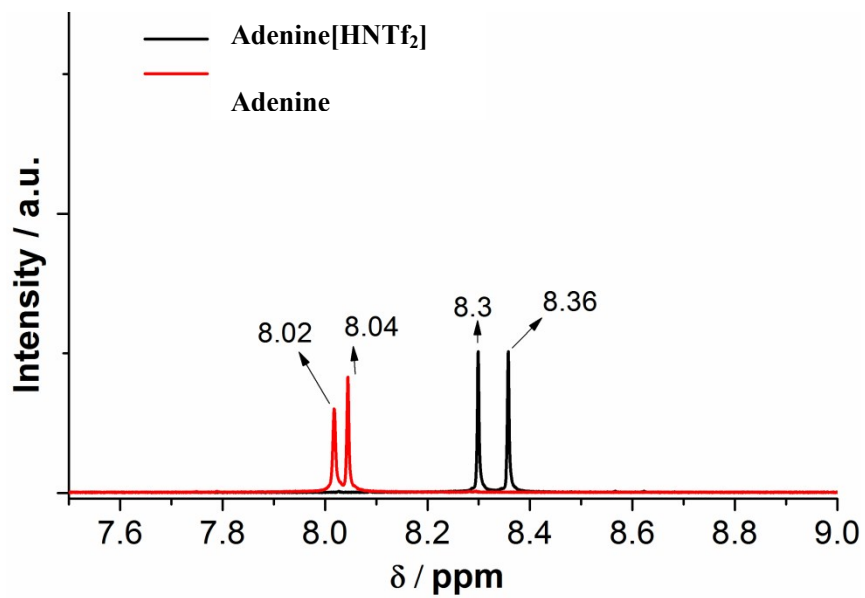

Figure S2. HNMR spectra of adenine and adenine[HNTf<sub>2</sub>] precursors.

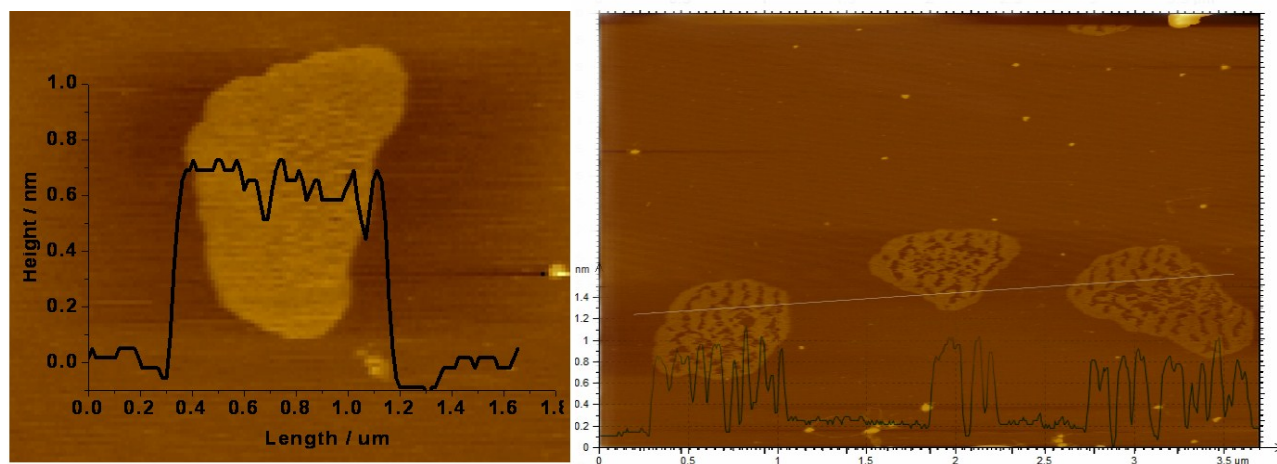

**Figure S3.** AFM image of the ionothermal carbon from A+HNTf<sub>2</sub>.

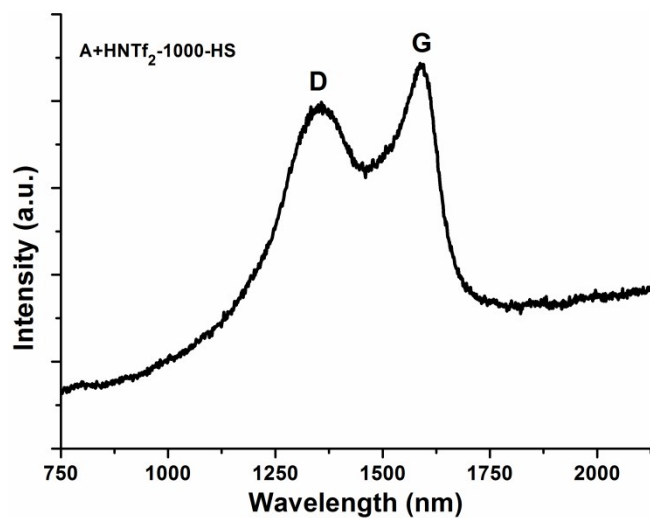

**Figure S4.** Raman spectrum of the ionothermal carbon from A+HNTf<sub>2</sub> carbonized at 1000 °C.
